# Supplementary material for: Autologous Peripheral Blood Mononuclear Cells in Patients with Small Artery Disease and Diabetic Foot Ulcers: Efficacy, Safety, and Economic Evaluation
Source: MDPI journal article supplement (doi:10.3390/jcm12124148), 2023-06-20
Supplement: s1 [file s1]

## SUPPLEMENTARY MATERIALS

**Table S1**– Costs (EUR) for hospital admission for foot-related conditions.

| DRG code and description of procedure                                                   | Hospital length >1 day | Day-hospital |
|-----------------------------------------------------------------------------------------|------------------------|--------------|
| 114 – Toe amputation for vascular diseases                                              | 8,962                  | 731          |
| 205 – Lower limb amputation for metabolic or endocrinological disease vascular diseases | 13,431                 | 482          |
| 130 – Peripheral revascularization with multiple comorbid conditions                    | 4,904                  | 390          |
| 131 – Peripheral revascularization without multiple comorbid conditions                 | 3,398                  | 390          |
| 556 – Peripheral revascularization with drug-eluting stent                              | 10,097                 | 731          |
| 418 - Post-surgical infection                                                           | 3,862                  | 453          |
| 238 – Osteomyelitis                                                                     | 5,974                  | 379          |
| 575 or 576 – Sepsis                                                                     | 6,974                  | 453          |

§ Hospital length without any additional costs; \*additional daily costs for hospitalization > length threshold

**Table S2** – Costs (EUR) associated to procedures and laboratory examinations.

| <b>DRG code and description of procedures</b>                    | <b>Costs (€)</b> |
|------------------------------------------------------------------|------------------|
| 88.28 Foot/ankle X-ray                                           | 21               |
| 88.38.7 Foot/ankle computed tomography                           | 173              |
| 88.77.2 Lower limbs ecocholor doppler                            | 49.5             |
| 88.94.1 Foot/ankle Nuclear Magnetic Resonance                    | 254              |
| 89.65.4 Transcutaneous oxygen monitoring                         | 18.6             |
| 90.16.3 Creatinine                                               | 1.2              |
| 90.28.1 Glycated Hemoglobin                                      | 10.6             |
| 90.27.1 Glycemia                                                 | 1.30             |
| 90.14.3 Total cholesterol                                        | 1.1              |
| 90.14.1 HDL cholesterol                                          | 1.8              |
| 90.43.2 Triglycerides                                            | 1.3              |
| 90.72.3 C-reactive protein                                       | 3.6              |
| 86.11 Cutaneous biopsy                                           | 13.9             |
| 90.85.2 Swab with antibiogram                                    | 12.2             |
| 99.24.2 Antibiotic infusion (cost for antibioitics not included) | 3.1              |
